# Supplementary material for: Characterization of bioactive compounds in commercial olive leaf extracts, and olive leaves and their infusions
Source: Royal Society of Chemistry journal article supplement (doi:10.1039/c9fo00698b), 2019-01-01
Supplement: c9fo00698b1.pdf [file c9fo00698b1.pdf]

- 1 **Table S1.** Identification, manufacturer and origin of commercial olive leaves (L) and
- 2 olive leaf extracts (E) samples.

| <b>Sample ID</b> | <b>Type</b>        | <b>Presentation</b> | <b>Manufacturer</b>        | <b>Origin</b>        |
|------------------|--------------------|---------------------|----------------------------|----------------------|
| L1               | Dry olive leaves   | Whole leaves        | Local herbalist shop       | Seville, Spain       |
| L2               | Dry olive leaves   | Whole leaves        | Asuca herbalist shop       | Seville, Spain       |
| L3               | Dry olive leaves   | Whole leaves        | Soria Natural S.A.         | Soria, Spain         |
| L4               | Dry olive leaves   | Whole leaves        | Herbodiet. Novadiet S.A.   | Burgos, Spain        |
| L5               | Dry olive leaves   | Whole leaves        | Plameca                    | Barcelona, Spain     |
| L6               | Dry olive leaves   | Whole leaves        | Acofarma Distribución S.A. | Barcelona, Spain     |
| L7               | Dry olive leaves   | Whole leaves        | Alesframa                  | Málaga, Spain        |
| L8               | Dry olive leaves   | Whole leaves        | Especias Pedroza           | Málaga, Spain        |
| L9               | Dry olive leaves   | Whole leaves        | Herbes del Molí, Coop V.   | Alicante, Spain      |
| L10              | Dry olive leaves   | Whole leaves        | Naturix24.de               | Dransfeld, Germany   |
| E1               | Olive leaf extract | Capsules/powder     | Swanson Health products    | Fargo, USA           |
| E2               | Olive leaf extract | Capsules/powder     | Mason Natural, INC.        | Miami, USA           |
| E3               | Olive leaf extract | Capsules/powder     | Prowise Healthcare         | Birmingham, UK       |
| E4               | Olive leaf extract | Capsules/powder     | Herbal Factors             | Monroe, WA, Canada   |
| E5               | Olive leaf extract | Capsules/powder     | Nature's Way Brands, LLC.  | Green Bay, WI, USA   |
| E6               | Olive leaf extract | Capsules/powder     | Vitasense                  | Holborn, London, UK  |
| E7               | Olive leaf extract | Capsules/powder     | Drasanvi, S.L.             | León, Spain          |
| E8               | Olive leaf extract | Liquid              | Comvita                    | Australia            |
| E9               | Olive leaf extract | Capsules/liquid     | Gaia Herbs, Inc.           | Brevard, NC, USA     |
| E10              | Olive leaf extract | Liquid              | Soria Natural S.A.         | Soria, Spain         |
| E11              | Olive leaf extract | Liquid              | Now Foods                  | Bloomington, IL, USA |

3

4

5

6

7

8

9

10

11

12

13

14

15

16 **Table S2.** Concentration (mg/kg) of oleosidic compounds in commercial olive leaves  
 17 (L) and olive leaf extracts (E) and olive leaves infusions (I) samples. Standard deviation  
 18 of replicates in parenthesis.

| Sample | Oleoside   | Secoxyloganin | Secologanoside | Ole11Me    | Total oleosidic compounds |
|--------|------------|---------------|----------------|------------|---------------------------|
| L1     | 2413 (66)  | 0 (0)         | 2493 (68)      | 1609 (262) | 6514 (396)                |
| L2     | 2286 (310) | 0 (0)         | 608 (2)        | 1091 (67)  | 3984 (244)                |
| L3     | 1878 (555) | 647 (133)     | 691 (123)      | 1202 (158) | 4419 (969)                |
| L4     | 4137 (214) | 0 (0)         | 1831 (187)     | 1926 (251) | 7894 (652)                |
| L5     | 3493 (352) | 954 (53)      | 2049 (381)     | 2317 (654) | 8813 (1440)               |
| L6     | 2125 (43)  | 911 (35)      | 3416 (225)     | 2254 (220) | 8706 (522)                |
| L7     | 3592 (145) | 538 (87)      | 1629 (104)     | 1726 (86)  | 7485 (40)                 |
| L8     | 4247 (200) | 1698 (73)     | 2424 (371)     | 2947 (532) | 11315 (1176)              |
| L9     | 3167 (195) | 1832 (80)     | 2111 (257)     | 2449 (101) | 9558 (41)                 |
| L10    | 1770 (345) | 0 (0)         | 1057 (83)      | 2094 (25)  | 4921 (288)                |
| E1     | 2290 (21)  | 258 (11)      | 711 (7)        | 1330 (99)  | 4732 (80)                 |
| E2     | 3046 (39)  | 661 (32)      | 1222 (2)       | 1896 (21)  | 6825 (16)                 |
| E3     | 2047 (26)  | 0 (0)         | 4766 (323)     | 7049 (168) | 13863 (517)               |
| E4     | 591 (43)   | 0 (0)         | 871 (9)        | 1157 (97)  | 2619 (149)                |
| E5     | 4608 (15)  | 589 (3)       | 4048 (24)      | 1564 (134) | 10810 (170)               |
| E6     | 5110 (90)  | 1389 (130)    | 6281 (49)      | 2589 (151) | 15370 (117)               |
| E7     | 6843 (321) | 4715 (778)    | 5201 (90)      | 4692 (354) | 21452 (1544)              |
| E8     | 530 (3)    | 0 (0)         | 706 (31)       | 218 (47)   | 1454 (76)                 |
| E9     | 1112 (61)  | 0 (0)         | 1266 (200)     | 1708 (740) | 4085 (479)                |
| E10    | 370 (61)   | 121 (3)       | 188 (30)       | 363 (47)   | 1042 (140)                |
| E11    | 1380 (138) | 154 (66)      | 1635 (131)     | 395 (9)    | 3563 (195)                |
| I1     | 9 (0)      | 0 (0)         | 10 (0)         | 6 (1)      | 25 (1)                    |
| I2     | 8 (0)      | 0 (0)         | 3 (0)          | 4 (1)      | 14 (1)                    |
| I3     | 4 (1)      | 1 (0)         | 2 (1)          | 4 (1)      | 12 (2)                    |
| I4     | 13 (1)     | 0 (0)         | 6 (1)          | 5 (1)      | 24 (2)                    |
| I5     | 14 (1)     | 1 (0)         | 8 (1)          | 7 (1)      | 30 (2)                    |
| I6     | 7 (1)      | 1 (0)         | 14 (2)         | 7 (1)      | 29 (3)                    |
| I7     | 12 (0)     | 0 (0)         | 5 (1)          | 5 (2)      | 22 (3)                    |
| I8     | 16 (1)     | 2 (0)         | 10 (0)         | 11 (0)     | 39 (1)                    |
| I9     | 12 (0)     | 2 (1)         | 9 (0)          | 8 (2)      | 32 (0)                    |
| I10    | 7 (0)      | 0 (0)         | 4 (0)          | 6 (0)      | 17 (0)                    |
